# Supplementary material
Source: MDPI journal article supplement (https://www.mdpi.com/1424-2818/15/5/683)
Supplement: s1 [file s1 › diversity-2297002-supplementary.pdf]

## Supplementary Materials

**Table S1.** Species common name, Latin name, native vs. non-native status and threatened status in accordance with Section 10 of the Flora and Fauna Guarantee Act (FFG) 1988 for the 573 or group of species reported (of which 443 were actual, identified species) for cases reported to Wildlife Victoria between 2010 and 2019.

| Species or group of species name     | Common name                | Latin name                      | Native status | FFG listed |
|--------------------------------------|----------------------------|---------------------------------|---------------|------------|
| Possum, Unidentified                 | Possum, Unidentified       | unknown                         | native        | N          |
| Kookaburra, Laughing                 | Laughing Kookaburra        | <i>Dacelo novaeguineae</i>      | native        | N          |
| Galah                                | Galah                      | <i>Eolophus roseicapilla</i>    | native        | N          |
| Mynah, Indian                        | Common Myna                | <i>Acridotheres tristis</i>     | non-native    | N          |
| Duck, Unidentified                   | Duck, Unidentified         | unknown                         | unknown       | N          |
| Kangaroo, Eastern Grey               | Eastern Grey Kangaroo      | <i>Macropus giganteus</i>       | native        | N          |
| Miner, Noisy                         | Noisy Miner                | <i>Manorina melanocephala</i>   | native        | N          |
| Cockatoo, Sulphur-crested            | Sulphur-crested Cockatoo   | <i>Cacatua galerita</i>         | native        | N          |
| Magpie                               | Australian Magpie          | <i>Gymnorhina tibicen</i>       | native        | N          |
| Bird, Unidentified                   | Bird, Unidentified         | unknown                         | unknown       | N          |
| Seal, Unidentified                   | Seal, Unidentified         | unknown                         | native        | N          |
| Cockatiel                            | Cockatiel                  | <i>Nymphicus hollandicus</i>    | non-native    | N          |
| Cockatoo, Unidentified               | Cockatoo, Unidentified     | unknown                         | unknown       | N          |
| Brushtail                            | Common Brushtail Possum    | <i>Trichosurus vulpecula</i>    | native        | N          |
| Raven                                | Australian Raven           | <i>Corvus coronoides</i>        | native        | N          |
| Egret, Little                        | Little Egret               | <i>Egretta garzetta</i>         | native        | Y          |
| Silvereye                            | Silvereye                  | <i>Zosterops lateralis</i>      | native        | N          |
| Unknown                              | unknown                    | unknown                         | unknown       | N          |
| Turtle, Unidentified                 | Turtle, Unidentified       | unknown                         | unknown       | N          |
| Ringtail                             | Common Ringtail Possum     | <i>Pseudocheirus peregrinus</i> | native        | N          |
| Rosella, Eastern                     | Eastern Rosella            | <i>Platycercus eximius</i>      | native        | N          |
| Wattlebird, Red                      | Red Wattlebird             | <i>Anthochaera carunculata</i>  | native        | N          |
| Flying-fox, Grey-headed              | Grey-headed Flying Fox     | <i>Pteropus poliocephalus</i>   | native        | Y          |
| Lark, Magpie                         | Magpielark                 | <i>Grallina cyanoleuca</i>      | native        | N          |
| Lorikeet, Rainbow                    | Rainbow Lorikeet           | <i>Trichoglossus moluccanus</i> | native        | N          |
| Pelican, Australian                  | Australian Pelican         | <i>Pelecanus conspicillatus</i> | native        | N          |
| Corella, Long-billed                 | Long-billed Corella        | <i>Cacatua tenuirostris</i>     | native        | N          |
| Wattle Bird, Unknown                 | unknown                    | unknown                         | native        | N          |
| Tawny Frogmouth                      | Tawny Frogmouth            | <i>Podargus strigoides</i>      | native        | N          |
| Duck, Australian Shelduck (Mountain) | Chestnut-breasted Shelduck | <i>Tadorna tadornoides</i>      | native        | N          |
| Penguin, Little                      | Little Penguin             | <i>Eudyptula minor</i>          | native        | N          |
| Koala                                | Koala                      | <i>Phascolarctos cinereus</i>   | native        | N          |
| Lizard, Unidentified                 | Lizard, Unidentified       | unknown                         | unknown       | N          |
| Lorikeet, Unidentified               | Lorikeet, Unidentified     | unknown                         | unknown       | N          |

|                                    |                             |                               |            |   |
|------------------------------------|-----------------------------|-------------------------------|------------|---|
| Frog, Green Tree                   | Green Tree Frog             | <i>Litoria caerulea</i>       | non-native | N |
| Rabbit, European                   | unknown                     | unknown                       | non-native | N |
| Echidna                            | Short-beaked Echidna        | <i>Tachyglossus aculeatus</i> | native     | N |
| Possum, Unidentified<br>Brush-tail | Common Brush-tail<br>Possum | <i>Trichosurus vulpecula</i>  | native     | N |
| Wombat, Bare-nosed                 | Common Wombat               | <i>Vombatus ursinus</i>       | native     | N |
| Glider, Sugar                      | Sugar Glider                | <i>Petaurus breviceps</i>     | native     | N |
| Frog, Unidentified                 | Frog, Unidentified          | unknown                       | unknown    | N |
| Seagull                            | unknown                     | unknown                       | native     | N |
| Pigeon, Feral                      | unknown                     | unknown                       | non-native | N |
| Hawk                               | Brown Goshawk               | <i>Accipiter fasciatus</i>    | native     | N |
| Parrot—Unidentified                | Parrot—Unidentified         | unknown                       | native     | N |
| Corella, Little                    | Little Corella              | <i>Cacatua sanguinea</i>      | native     | N |
| Wallaby, Unidentified              | Wallaby, Unidentified       | unknown                       | native     | N |
| Sparrow, House                     | House Sparrow               | <i>Passer domesticus</i>      | non-native | N |
| Snake, Tiger                       | Mainland Island Snake       | <i>Notechis scutatus</i>      | native     | N |
| Seal, Australian Fur               | Australian Fur Seal         | <i>Arctocephalus pusillus</i> | native     | N |
| Cockatoo, Major<br>Mitchell        | Leadbeater's Cockatoo       | <i>Cacatua leadbeateri</i>    | native     | Y |
| Deer, Unidentified                 | Deer, Unidentified          | unknown                       | non-native | N |
| Eagle, Unidentified                | Eagle, Unidentified         | unknown                       | native     | N |
| Pigeon, Unidentified               | Pigeon, Unidentified        | unknown                       | non-native | N |
| Rosella, Crimson                   | Crimson Rosella             | <i>Platycercus elegans</i>    | native     | N |
| Duck, Pacific Black                | Pacific Black Duck          | <i>Anas superciliosa</i>      | native     | N |
| Sparrow—<br>Unidentified           | Sparrow—<br>Unidentified    | unknown                       | non-native | N |
| Lizard, Common Blue-<br>tongued    | Common Bluetongue           | <i>Tiliqua scincoides</i>     | native     | N |
| Fox, Red                           | Red Fox                     | <i>Vulpes vulpes</i>          | non-native | N |
| Duck, Wood                         | Maned Duck                  | <i>Chenonetta jubata</i>      | native     | N |
| Bat, Unidentified                  | Bat, Unidentified           | unknown                       | native     | N |
| Tern, Common                       | Common Tern                 | <i>Sterna hirundo</i>         | native     | N |
| Rosella, Unidentified              | Rosella, Unidentified       | unknown                       | unknown    | N |
| Dove, Spotted Turtle               | Spotted Dove                | <i>Spilopelia chinensis</i>   | non-native | N |
| Parrot, Red-rumped                 | Red-rumped Parrot           | <i>Psephotus haematonotus</i> | native     | N |
| Mouse, House                       | House Mouse                 | <i>Mus musculus</i>           | non-native | N |
| Swan, Black                        | Black Swan                  | <i>Cygnus atratus</i>         | native     | N |
| Rattus, Unidentified               | Rattus, Unidentified        | unknown                       | non-native | N |
| Falcon, Unidentified               | Falcon, Unidentified        | unknown                       | native     | N |
| Snake, Copperhead sp.              | unknown                     | unknown                       | native     | N |
| Goanna, Tree                       | Lace Monitor                | <i>Varanus varius</i>         | native     | N |
| Duck, Teal—<br>Unidentified        | Duck, Teal—<br>Unidentified | unknown                       | native     | N |
| Penguin—Unidentified               | Penguin—Unidentified        | unknown                       | unknown    | N |
| Blackbird, Common                  | Eurasian Blackbird          | <i>Turdus merula</i>          | non-native | N |
| Rabbit, Brown                      | unknown                     | unknown                       | non-native | N |
| Bat, Micro                         | unknown                     | unknown                       | native     | N |
| Swan, Unidentified                 | Swan, Unidentified          | unknown                       | native     | N |

|                                   |                              |                                         |            |   |
|-----------------------------------|------------------------------|-----------------------------------------|------------|---|
| Honey Eater,<br>Unidentified      | Honey Eater,<br>Unidentified | unknown                                 | native     | N |
| Heron, Unidentified               | Heron, Unidentified          | unknown                                 | native     | N |
| Lizard, Stumpy Tailed             | Shingleback Lizard           | <i>Tiliqua rugosa</i>                   | native     | N |
| Rat, Black                        | unknown                      | unknown                                 | non-native | N |
| Starling, Common                  | Starling                     | <i>Sturnus vulgaris</i>                 | non-native | N |
| Owl, Unidentified                 | Owl, Unidentified            | unknown                                 | native     | N |
| Ibis, Sacred                      | Australian Ibis              | <i>Threskiornis moluccus</i>            | native     | N |
| Gull, Silver                      | Silver Gull                  | <i>Larus novaehollandiae</i>            | native     | N |
| Cat                               | unknown                      | unknown                                 | non-native | N |
| Wallaroo, Eastern                 | Common Wallaroo              | <i>Macropus robustus</i>                | native     | Y |
| Owl, Boobook                      | Southern Boobook             | <i>Ninox boobook</i>                    | native     | N |
| Cormorant, Pied                   | Australian Pied<br>Cormorant | <i>Phalacrocorax varius</i>             | native     | N |
| Antechinus,<br>unidentified       | Antechinus,<br>unidentified  | unknown                                 | native     | N |
| Pigeon, Crested                   | Crested Pigeon               | <i>Ocyphaps lophotes</i>                | native     | N |
| Pardalote—<br>unidentified        | Pardalote—<br>unidentified   | unknown                                 | native     | N |
| Snake, Unidentified               | Snake, Unidentified          | unknown                                 | unknown    | N |
| Snake, Eastern Brown              | Eastern Brown Snake          | <i>Pseudonaja textilis</i>              | native     | N |
| Dog, Feral                        | unknown                      | unknown                                 | non-native | N |
| Snake, Carpet Python              | Diamond Python               | <i>Morelia spilota</i>                  | native     | Y |
| Lizard, Blotched Blue-<br>tongued | Blotched Bluetongue          | <i>Tiliqua nigrolutea</i>               | native     | N |
| Dragon, Eastern<br>Bearded        | Jew Lizard                   | <i>Pogona barbata</i>                   | native     | N |
| Lizard, Shingleback               | Shingleback Lizard           | <i>Tiliqua rugosa</i>                   | native     | N |
| Parrot, Australian King           | Australian King-parrot       | <i>Alisterus scapularis</i>             | native     | N |
| Ibis, Unidentified                | Ibis, Unidentified           | unknown                                 | unknown    | N |
| Kingfisher,<br>Unidentified       | Kingfisher,<br>Unidentified  | unknown                                 | unknown    | N |
| Bee                               | unknown                      | unknown                                 | unknown    | N |
| Honeyeater, New<br>Holland        | New Holland<br>Honeyeater    | <i>Phylidonyris<br/>novaehollandiae</i> | native     | N |
| Guinea Pig                        | unknown                      | unknown                                 | non-native | N |
| Heron, White-faced                | White-faced Heron            | <i>Egretta novaehollandiae</i>          | native     | N |
| Wallaby, Swamp                    | Swamp Wallaby                | <i>Wallabia bicolor</i>                 | native     | N |
| Cockatoo, Gang-gang               | Gang-gang Cockatoo           | <i>Callocephalon fimbriatum</i>         | native     | N |
| Pee Wee                           | Magpielark                   | <i>Grallina cyanoleuca</i>              | native     | N |
| Owl, Southern<br>Boobook          | Southern Boobook             | <i>Ninox boobook</i>                    | native     | N |
| Parrot, Green Grass               | Red-rumped Parrot            | <i>Psephotus haematonotus</i>           | native     | N |
| Wattlebird, Little                | Little Wattlebird            | <i>Anthochaera lunulata</i>             | native     | N |
| Goose—Unidentified                | Goose—Unidentified           | unknown                                 | unknown    | N |
| Chough, White-winged              | White-winged Chough          | <i>Corcorax melanorhamphos</i>          | native     | N |
| Wasp, European                    | unknown                      | unknown                                 | non-native | N |
| Butcherbird, Grey                 | Grey Butcherbird             | <i>Cracticus torquatus</i>              | native     | N |
| Rat, Brown                        | unknown                      | unknown                                 | non-native | N |

|                              |                            |                                 |            |   |
|------------------------------|----------------------------|---------------------------------|------------|---|
| Dove, Unidentified           | Dove, Unidentified         | unknown                         | unknown    | N |
| Lorikeet, Musk               | Musk Lorikeet              | <i>Glossopsitta concinna</i>    | native     | N |
| Hen, Water                   | unknown                    | unknown                         | native     | N |
| Tern, Crested                | Crested Tern               | <i>Thalasseus bergii</i>        | native     | N |
| Spider, unidentified         | Spider, unidentified       | unknown                         | unknown    | N |
| Gull, Pacific                | Pacific Gull               | <i>Larus pacificus</i>          | native     | N |
| Bandicoot, Unidentified      | Bandicoot, Unidentified    | unknown                         | native     | N |
| Possum, Mountain Brushtail   | Mountain Brushtail Possum  | <i>Trichosurus cunninghami</i>  | native     | N |
| Lizard, Gecko Unidentified   | Lizard, Gecko Unidentified | unknown                         | native     | N |
| Cormorant, Great             | Great Cormorant            | <i>Phalacrocorax carbo</i>      | native     | N |
| Shearwater—unidentified      | Shearwater—unidentified    | unknown                         | native     | N |
| Tortoise, Common Long-necked | Eastern long-necked turtle | <i>Chelodina longicollis</i>    | native     | N |
| Marsupial, Unidentified      | Marsupial, Unidentified    | unknown                         | native     | N |
| Fish, Unknown                | unknown                    | unknown                         | unknown    | N |
| Lapwing, Masked              | Masked Plover              | <i>Vanellus miles</i>           | native     | N |
| Lorikeet, Little             | Little Lorikeet            | <i>Glossopsitta pusilla</i>     | native     | N |
| Glider, Feathertail          | Pygmy Gliding Possum       | <i>Acrobates pygmaeus</i>       | native     | N |
| Possum, Eastern Pygmy        | Eastern Pygmy-possum       | <i>Cercartetus nanus</i>        | native     | N |
| Emu                          | Common Emu                 | <i>Dromaius novaehollandiae</i> | native     | N |
| Budgerigar                   | Budgerigar                 | <i>Melopsittacus undulatus</i>  | non-native | N |
| Finch, Unidentified          | Finch, Unidentified        | unknown                         | native     | N |
| Goose—Feral                  | unknown                    | unknown                         | non-native | N |
| Eagle, Wedge-tailed          | Wedge-tailed Eagle         | <i>Aquila audax</i>             | native     | N |
| Thrush, Grey Shrike          | Grey Shrike-thrush         | <i>Colluricincla harmonica</i>  | native     | N |
| Snake, Diamond Python        | Diamond Python             | <i>Morelia spilota</i>          | native     | Y |
| Plover, Unidentified         | Plover, Unidentified       | unknown                         | native     | N |
| Pigeon—Racing                | unknown                    | unknown                         | non-native | N |
| Platypus                     | Platypus                   | <i>Ornithorhynchus anatinus</i> | native     | N |
| Plover, Hooded               | Hooded Plover              | <i>Thinornis cucullatus</i>     | native     | Y |
| Sparrow, Eurasian Tree       | Eurasian Tree Sparrow      | <i>Passer montanus</i>          | non-native | N |
| Gannet, Australasian         | Australasian Gannet        | <i>Morus serrator</i>           | native     | N |
| Cormorant, Little Pied       | Little Pied Cormorant      | <i>Microcarbo melanoleucos</i>  | native     | N |
| Frog, Southern Brown Tree    | Brown Tree Frog            | <i>Litoria ewingii</i>          | native     | N |
| Bird, Small Bell Bird        | unknown                    | unknown                         | native     | N |
| Coot, Eurasian               | European Coot              | <i>Fulica atra</i>              | native     | N |
| Kingfisher, Sacred           | Sacred Kingfisher          | <i>Todiramphus sanctus</i>      | native     | N |
| Gannet—Unidentified          | Gannet—Unidentified        | unknown                         | native     | N |
| Hen, Purple Swamp            | Purple Swamp-Hen           | <i>Porphyrio porphyrio</i>      | native     | N |
| Kite, Black-shouldered       | Black-shouldered Kite      | <i>Elanus axillaris</i>         | native     | N |

|                               |                              |                                   |            |   |
|-------------------------------|------------------------------|-----------------------------------|------------|---|
| Lace Monitor                  | Lace Monitor                 | <i>Varanus varius</i>             | native     | N |
| Snake, Red-bellied Black      | Red-bellied Black Snake      | <i>Pseudechis porphyriacus</i>    | native     | N |
| Kestral, Australian           | Australian Kestrel           | <i>Falco cenchroides</i>          | native     | N |
| Currawong, Pied               | Pied Currawong               | <i>Strepera graculina</i>         | native     | N |
| Miner, Unidentified           | Miner, Unidentified          | unknown                           | unknown    | N |
| Parrot, Regent                | Regent Parrot                | <i>Polytelis anthopeplus</i>      | native     | Y |
| Currawong, Grey               | Grey Currawong               | <i>Strepera versicolor</i>        | native     | N |
| Ferret                        | unknown                      | unknown                           | non-native | N |
| Dove, Peaceful                | Peaceful Dove                | <i>Geopelia placida</i>           | native     | N |
| Duck, Mallard                 | unknown                      | unknown                           | non-native | N |
| Parrot, Elegant               | Elegant Parrot               | <i>Neophema elegans</i>           | native     | N |
| Hawk, Sparrow                 | unknown                      | unknown                           | native     | N |
| Owl, Barn                     | Common Barn-owl              | <i>Tyto alba</i>                  | native     | N |
| Quail – Unidentified          | Quail – Unidentified         | unknown                           | native     | N |
| Falcon, Peregrine             | Peregrine Falcon             | <i>Falco peregrinus</i>           | native     | N |
| Parrot, Superb                | Superb Parrot                | <i>Polytelis swainsonii</i>       | native     | Y |
| Peacock                       | Common Peafowl               | <i>Pavo cristatus</i>             | non-native | N |
| Shearwater, Short-tailed      | Short-tailed Shearwater      | <i>Ardenna tenuirostris</i>       | native     | N |
| Kitten                        | unknown                      | unknown                           | non-native | N |
| Dove, Diamond                 | Diamond Dove                 | <i>Geopelia cuneata</i>           | native     | Y |
| Duck, Freckled                | Freckled Duck                | <i>Stictonetta naevosa</i>        | native     | Y |
| Eagle, Little                 | Little Eagle                 | <i>Hieraaetus morphnoides</i>     | native     | N |
| Bat, Chocolate Wattled        | Chocolate Wattled Bat        | <i>Chalinolobus morio</i>         | native     | N |
| Bandicoot, Southern Brown     | Southern Brown Bandicoot     | <i>Isoodon obesulus</i>           | native     | Y |
| Albatross                     | unknown                      | unknown                           | native     | N |
| Mouse, Heath                  | Shortridge's Native Mouse    | <i>Pseudomys shortridgei</i>      | native     | Y |
| Cockatoo, Yellow-tailed Black | Yellow-tailed Black-cockatoo | <i>Zanda funerea</i>              | native     | N |
| Cockatoo, Red-tailed Black    | Red-tailed Black Cockatoo    | <i>Calyptorhynchus banksii</i>    | native     | Y |
| Glider, Unidentified          | Glider, Unidentified         | unknown                           | native     | N |
| Mouse, Mitchell's Hopping     | Mitchell's Hopping Mouse     | <i>Notomys mitchellii</i>         | native     | N |
| Dolphin, Bottlenose           | Common Bottlenose Dolphin    | <i>Tursiops truncatus</i>         | native     | N |
| Egret, Cattle                 | Cattle Egret                 | <i>Bubulcus ibis</i>              | native     | N |
| Crane                         | Brolga                       | <i>Antigone rubicunda</i>         | native     | Y |
| Ibis, Glossy                  | Glossy Ibis                  | <i>Plegadis falcinellus</i>       | native     | N |
| Cockatoo, Pink                | Leadbeater's Cockatoo        | <i>Cacatua leadbeateri</i>        | native     | Y |
| Duck, Chestnut Teal           | Chestnut Teal                | <i>Anas castanea</i>              | native     | N |
| Bronzewing, Common            | Common Bronzewing            | <i>Phaps chalcoptera</i>          | native     | N |
| Dog, Dingo & feral            | unknown                      | unknown                           | non-native | N |
| Dolphin, Common               | Short-beaked Common Dolphin  | <i>Delphinus delphis</i>          | native     | N |
| Cormorant, Little Black       | Little Black Cormorant       | <i>Phalacrocorax sulcirostris</i> | native     | N |

|                                |                               |                                     |            |   |
|--------------------------------|-------------------------------|-------------------------------------|------------|---|
| Moorhen, Dusky                 | Dusky Moorhen                 | <i>Gallinula tenebrosa</i>          | native     | N |
| Phascogale, Brush-tailed       | Brush-tailed Phascogale       | <i>Phascogale tapoatafa</i>         | native     | Y |
| Grebe, Australasian            | Australasian Grebe            | <i>Tachybaptus novaehollandiae</i>  | native     | N |
| Rat, Swamp                     | Australian Swamp Rat          | <i>Rattus lutreolus</i>             | native     | N |
| Owl, Powerful                  | Powerful Owl                  | <i>Ninox strenua</i>                | native     | Y |
| Owl, Australian Owlet-nightjar | Australian Owlet-nightjar     | <i>Aegotheles cristatus</i>         | native     | N |
| Grebe, Hoary-headed            | Hoary-headed Grebe            | <i>Poliocephalus poliocephalus</i>  | native     | N |
| Duck, Muscovy                  | unknown                       | unknown                             | native     | N |
| Harrier, Marsh                 | Swamp harrier                 | <i>Circus approximans</i>           | native     | N |
| Bat, White-striped Freetail    | White-striped Free-tailed Bat | <i>Austronomus australis</i>        | native     | N |
| Goshawk, Brown                 | Brown Goshawk                 | <i>Accipiter fasciatus</i>          | native     | N |
| Stingray                       | unknown                       | unknown                             | native     | N |
| Wagtail, Willie                | Willie Wagtail                | <i>Rhipidura leucophrys</i>         | native     | N |
| Cockatoo, Glossy Black         | Glossy Black Cockatoo         | <i>Calyptorhynchus lathami</i>      | native     | Y |
| Pigeon, Wonga                  | Wonga Pigeon                  | <i>Leucosarcia melanoleuca</i>      | native     | N |
| Antechinus, Dusky              | Dusky Antechinus              | <i>Antechinus swainsonii</i>        | native     | N |
| Mallee Fowl                    | Malleefowl                    | <i>Leipoa ocellata</i>              | native     | Y |
| Giant-Petrel, Southern         | Southern Giant Petrel         | <i>Macronectes giganteus</i>        | native     | Y |
| Pheasant                       | Common Pheasant               | <i>Phasianus colchicus</i>          | non-native | N |
| Cow, Domestic                  | unknown                       | unknown                             | non-native | N |
| Insect                         | unknown                       | unknown                             | unknown    | N |
| Hobby, Australian              | Australian Hobby              | <i>Falco longipennis</i>            | native     | N |
| Plover, Masked                 | Masked Plover                 | <i>Vanellus miles</i>               | native     | N |
| Storm-Petrel, White-faced      | White-faced Storm Petrel      | <i>Pelagodroma marina</i>           | native     | N |
| Giant-Petrel, Northern         | Northern Giant-Petrel         | <i>Macronectes halli</i>            | native     | Y |
| Possum, Unidentified pygmy-    | Possum, Unidentified pygmy-   | unknown                             | native     | N |
| Whale, Southern Right          | Southern Right Whale          | <i>Eubalaena australis</i>          | native     | Y |
| Whale, Unidentified            | Whale, Unidentified           | unknown                             | unknown    | N |
| Parrot, Swift                  | Swift Parrot                  | <i>Lathamus discolor</i>            | native     | Y |
| Crow, Unidentified             | Crow, Unidentified            | unknown                             | native     | N |
| Falcon, Brown                  | Brown Falcon                  | <i>Falco berigora</i>               | native     | N |
| Falcon, Black                  | Black Falcon                  | <i>Falco subniger</i>               | native     | Y |
| Heron, Pacific                 | White-necked Heron            | <i>Ardea pacifica</i>               | native     | N |
| Bat, Lesser Long-eared         | Lesser Long-eared Bat         | <i>Nyctophilus geoffroyi</i>        | native     | N |
| Owl, Masked                    | Australian Masked Owl         | <i>Tyto novaehollandiae</i>         | native     | Y |
| Lorikeet, Purple-crowned       | Purple-crowned Lorikeet       | <i>Glossopsitta porphyrocephala</i> | native     | N |
| Wallaby, Red-necked            | Bennett's Wallaby             | <i>Macropus rufogriseus</i>         | native     | N |
| Nankeen Kestrel (Australian)   | Australian Kestrel            | <i>Falco cenchroides</i>            | native     | N |
| Superb Fairy Wren              | Superb Fairy-wren             | <i>Malurus cyaneus</i>              | native     | N |

|                            |                            |                                  |            |   |
|----------------------------|----------------------------|----------------------------------|------------|---|
| Seal, Leopard              | Leopard Seal               | <i>Hydrurga leptonyx</i>         | native     | N |
| Bat, Eastern Horseshoe     | Eastern Horseshoe Bat      | <i>Rhinolophus megaphyllus</i>   | native     | Y |
| Lark, Mud                  | Magpielark                 | <i>Grallina cyanoleuca</i>       | native     | N |
| Kite, Whistling            | Whistling Kite             | <i>Haliastur sphenurus</i>       | native     | N |
| Dunnart, Common            | Common Dunnart             | <i>Sminthopsis murina</i>        | native     | N |
| Parakeet                   | unknown                    | unknown                          | non-native | N |
| Lapwing, Banded            | Banded Lapwing             | <i>Vanellus tricolor</i>         | native     | N |
| Tortoise, Unidentified     | Tortoise, Unidentified     | unknown                          | unknown    | N |
| Honeyeater, White-eared    | White-eared Honeyeater     | <i>Nesoptilotis leucotis</i>     | native     | N |
| Frog, Striped Marsh        | Brown Frog                 | <i>Limnodynastes peronii</i>     | native     | N |
| Parrot, Ground             | Ground Parrot              | <i>Pezoporus wallicus</i>        | native     | Y |
| Bilby                      | Bilby                      | <i>Macrotis lagotis</i>          | native     | N |
| Hare                       | unknown                    | unknown                          | non-native | N |
| Glider, Yellow-bellied     | Yellow-bellied Glider      | <i>Petaurus australis</i>        | native     | N |
| Swallow, Welcome           | Welcome Swallow            | <i>Hirundo neoxena</i>           | native     | N |
| Fantail, Grey              | Grey Fantail               | <i>Rhipidura albiscapa</i>       | native     | N |
| Ibis, Straw-necked         | Straw-necked Ibis          | <i>Threskiornis spinicollis</i>  | native     | N |
| Rat, Bush                  | Bush Rat                   | <i>Rattus fuscipes</i>           | native     | N |
| Heron, Rufous Night        | Nankeen Night-Heron        | <i>Nycticorax caledonicus</i>    | native     | N |
| Goshawk, Grey (White)      | Grey Goshawk               | <i>Accipiter novaehollandiae</i> | native     | Y |
| Kangaroo, Western Grey     | Western Gray Kangaroo      | <i>Macropus fuliginosus</i>      | native     | N |
| Rodent, Unidentified Small | Rodent, Unidentified Small | unknown                          | unknown    | N |
| Mouse, New Holland         | New Holland Mouse          | <i>Pseudomys novaehollandiae</i> | native     | Y |
| Bat, Inland Forest         | Inland Forest Bat          | <i>Vespadelus baverstocki</i>    | native     | N |
| Finch, Gold                | European Goldfinch         | <i>Carduelis carduelis</i>       | native     | N |
| Non-native species         | unknown                    | unknown                          | non-native | N |
| Livestock                  | unknown                    | unknown                          | non-native | N |
| Firetail, Red-browed       | Red-browed Finch           | <i>Neochmia temporalis</i>       | native     | N |
| Rat, Water                 | Common Water Rat           | <i>Hydromys chrysogaster</i>     | native     | N |
| Pigeon, Wood               | Crested Pigeon             | <i>Ocyphaps lophotes</i>         | native     | N |
| Kingfisher, Azure          | Azure Kingfisher           | <i>Ceyx azureus</i>              | native     | N |
| Dunnart, Fat-tailed        | Fat-tailed Dunnart         | <i>Sminthopsis crassicaudata</i> | native     | N |
| Honeyeater, White-plumed   | White-plumed Honeyeater    | <i>Ptilotula penicillata</i>     | native     | N |
| Duck, Grey Teal            | Grey Teal                  | <i>Anas gracilis</i>             | native     | N |
| Honeyeater, White-naped    | White-naped Honeyeater     | <i>Melithreptus lunatus</i>      | native     | N |
| Egret, Great               | Great White Egret          | <i>Ardea alba</i>                | native     | Y |
| Quail-thrush, Spotted      | Spotted Quail-thrush       | <i>Cinclosoma punctatum</i>      | native     | N |
| Central Bearded Dragon     | Central Bearded Dragon     | <i>Pogona vitticeps</i>          | native     | N |
| Rail, Buff-banded          | Buff-banded Rail           | <i>Hypotaenidia philippensis</i> | native     | N |
| Owl, Barking               | Barking Boobook            | <i>Ninox connivens</i>           | native     | Y |
| Murray River Tortoise      | Murray River turtle        | <i>Emydura macquarii</i>         | native     | N |

|                               |                              |                                  |            |   |
|-------------------------------|------------------------------|----------------------------------|------------|---|
| Marbled Gecko                 | Marbled Southern Gecko       | <i>Christinus marmoratus</i>     | native     | N |
| Button-quail, Little          | Little Buttonquail           | <i>Turnix velox</i>              | native     | N |
| Grebe, Great Crested          | Great Crested Grebe          | <i>Podiceps cristatus</i>        | native     | N |
| Butcherbird, Pied             | Pied Butcherbird             | <i>Cracticus nigrogularis</i>    | native     | N |
| Mouse, Silky                  | Silky Mouse                  | <i>Pseudomys apodemoides</i>     | native     | N |
| Bittern, Australasian         | Australasian Bittern         | <i>Botaurus poiciloptilus</i>    | native     | Y |
| Large Brown Tree Frog         | Large Brown Tree Frog        | <i>Litoria littlejohni</i>       | native     | Y |
| Pardalote, Spotted            | Spotted Pardalote            | <i>Pardalotus punctatus</i>      | native     | N |
| Fairy-wren, Splendid          | Splendid Fairy-wren          | <i>Malurus splendens</i>         | native     | N |
| Spoonbill, Royal              | Royal Spoonbill              | <i>Platalea regia</i>            | native     | N |
| Glider, Greater               | Greater Glider               | <i>Petauroides volans</i>        | native     | Y |
| Darter                        | Australasian Darter          | <i>Anhinga novaehollandiae</i>   | native     | N |
| Quoll, Spot-Tailed (Tiger)    | Spotted-tailed Quoll         | <i>Dasyurus maculatus</i>        | native     | Y |
| Goose, Cape Barren            | Cape Barren Goose            | <i>Cereopsis novaehollandiae</i> | native     | N |
| Black-Cockatoo, Yellow-tailed | Yellow-tailed Black-cockatoo | <i>Zanda funerea</i>             | native     | N |
| Marine Turtle sp.             | unknown                      | unknown                          | unknown    | N |
| Cuckoo, Fan-tailed            | Fan-tailed Cuckoo            | <i>Cacomantis flabelliformis</i> | native     | N |
| Raven, Little                 | Little Raven                 | <i>Corvus mellori</i>            | native     | N |
| Whistler, Golden              | Golden Whistler              | <i>Pachycephala pectoralis</i>   | native     | N |
| Bat, Little Forest            | Little Forest Bat            | <i>Vespadelus vulturnus</i>      | native     | N |
| Swamphen, Purple              | Purple Swamp-Hen             | <i>Porphyrio porphyrio</i>       | native     | N |
| Raven, Forest                 | Forest Raven                 | <i>Corvus tasmanicus</i>         | native     | N |
| Shag, Black-faced             | Black-faced Cormorant        | <i>Phalacrocorax fuscescens</i>  | native     | N |
| Wallaby, Brush-tailed Rock    | Brush-tailed Rock Wallaby    | <i>Petrogale penicillata</i>     | native     | Y |
| Shrike-thrush, Grey           | Grey Shrike-thrush           | <i>Colluricincla harmonica</i>   | native     | N |
| Robin, Flame                  | Flame Robin                  | <i>Petroica phoenicea</i>        | native     | N |
| Falcon, Grey                  | Grey Falcon                  | <i>Falco hypoleucos</i>          | native     | Y |
| Egret, Intermediate           | Intermediate Egret           | <i>Ardea intermedia</i>          | native     | Y |
| Gippsland Water Dragon        | Eastern Water Dragon         | <i>Intellagama lesueurii</i>     | native     | N |
| Brolga                        | Brolga                       | <i>Antigone rubicunda</i>        | native     | Y |
| Plover, Black-fronted         | Black-fronted Dotterel       | <i>Elseiyornis melanops</i>      | native     | N |
| Southern Elephant Seal        | Southern Elephant Seal       | <i>Mirounga leonina</i>          | native     | N |
| Owl, Sooty                    | Sooty Owl                    | <i>Tyto tenebricosa</i>          | native     | Y |
| Goldfinch, European           | European Goldfinch           | <i>Carduelis carduelis</i>       | non-native | N |
| Robin, Scarlet                | Scarlet Robin                | <i>Petroica boodang</i>          | native     | N |
| Lyrebird, Superb              | Superb Lyrebird              | <i>Menura novaehollandiae</i>    | native     | N |
| Quail, Brown                  | Brown Quail                  | <i>Synoicus ypsilophorus</i>     | native     | N |
| Honeyeater, Striped           | Striped Honeyeater           | <i>Plectorhyncha lanceolata</i>  | native     | N |
| Cuckoo-shrike, Black-faced    | Black-faced Cuckoo-shrike    | <i>Coracina novaehollandiae</i>  | native     | N |
| Lowland Copperhead            | Lowlands Copperhead          | <i>Austrelaps superbus</i>       | native     | N |
| Quail, Stubble                | Stubble Quail                | <i>Coturnix pectoralis</i>       | native     | N |
| Lizard, Frill neck            | Frilled Lizard               | <i>Chlamydosaurus kingii</i>     | native     | N |
| Miner, Bell                   | Bell Miner                   | <i>Manorina melanophrys</i>      | native     | N |

|                              |                              |                                  |            |   |
|------------------------------|------------------------------|----------------------------------|------------|---|
| Antechinus, Brown            | Brown Antechinus             | <i>Antechinus stuartii</i>       | native     | N |
| Cuckoo, Pallid               | Pallid Cuckoo                | <i>Heteroscenes pallidus</i>     | native     | N |
| Quail, King                  | Blue Quail                   | <i>Synoicus chinensis</i>        | native     | N |
| Honeyeater, Tawny-crowned    | Tawny-crowned Honeyeater     | <i>Gliciphila melanops</i>       | native     | N |
| Robin, Red-capped            | Red-capped Robin             | <i>Petroica goodenovii</i>       | native     | N |
| Western Blue-tongued Lizard  | Western Bluetongue           | <i>Tiliqua occipitalis</i>       | native     | N |
| Kite, Square-tailed          | Square-tailed Kite           | <i>Lophoictinia isura</i>        | native     | Y |
| Mallee Spadefoot Toad        | Painted Burrowing Frog       | <i>Neobatrachus pictus</i>       | native     | N |
| Snake, Western Brown         | Western Brown Snake          | <i>Pseudonaja mengdeni</i>       | native     | N |
| Honeyeater, White-fronted    | White-fronted Honeyeater     | <i>Purnella albifrons</i>        | native     | N |
| Swallow, White-backed        | White-backed Swallow         | <i>Cheramoeca leucosterna</i>    | native     | N |
| Thrush, Song                 | Song Thrush                  | <i>Turdus philomelos</i>         | native     | N |
| White-necked Heron           | White-necked Heron           | <i>Ardea pacifica</i>            | native     | N |
| Eagle, White-bellied Sea     | White-bellied Sea-Eagle      | <i>Haliaeetus leucogaster</i>    | native     | Y |
| Curl Snake                   | Curl Snake                   | <i>Suta suta</i>                 | native     | N |
| Cuckoo, Black-eared          | Black-eared Cuckoo           | <i>Chalcites osculans</i>        | native     | N |
| Sparrowhawk, Collared        | Collared Sparrowhawk         | <i>Accipiter cirrocephalus</i>   | native     | N |
| Nightjar, Spotted            | Spotted Eared-Nightjar       | <i>Eurostopodus argus</i>        | native     | N |
| Kangaroo, Red                | Red Kangaroo                 | <i>Macropus rufus</i>            | native     | N |
| Bowerbird, Satin             | Satin Bowerbird              | <i>Ptilonorhynchus violaceus</i> | native     | N |
| Harrier, Spotted             | Spotted Harrier              | <i>Circus assimilis</i>          | native     | N |
| Crocodile                    | unknown                      | unknown                          | non-native | N |
| Australian Sea-lion          | Australian Sea Lion          | <i>Neophoca cinerea</i>          | native     | N |
| Garden Skink                 | Pale-flecked Garden Sunskink | <i>Lampropholis guichenoti</i>   | native     | N |
| Pardalote, Striated          | Striated Pardalote           | <i>Pardalotus striatus</i>       | native     | N |
| Blind Snake                  |                              |                                  |            |   |
| Ramphotyphlops proximus      | Proximus Blind Snake         | <i>Anilius proximus</i>          | native     | N |
| Cuckoo-strike, White-bellied | White-bellied Cuckooshrike   | <i>Coracina papuensis</i>        | native     | N |
| Miner, Yellow-throated       | Yellow-throated Miner        | <i>Manorina flavigula</i>        | native     | N |
| Robin, Eastern Yellow        | Eastern Yellow Robin         | <i>Eopsaltria australis</i>      | native     | N |
| Bat, Gould's Wattled         | Gould's Wattled Bat          | <i>Chalinolobus gouldii</i>      | native     | N |
| Diving-Petrel, Common        | Common Diving-Petrel         | <i>Pelecanoides urinatrix</i>    | native     | N |
| Little Whip Snake            | Little Whip Snake            | <i>Parasuta flagellum</i>        | native     | N |
| Duck, Hardhead               | Hardhead                     | <i>Aythya australis</i>          | native     | N |
| Parrot, Mulga                | Mulga Parrot                 | <i>Psephotellus varius</i>       | native     | N |
| Babbler, Grey-crowned        | Grey-crowned Babbler         | <i>Pomatostomus temporalis</i>   | native     | Y |
| Masters's Snake              | Master's Snake               | <i>Drysdalia mastersii</i>       | native     | N |
| Chat, White-fronted          | White-fronted Chat           | <i>Epthianura albifrons</i>      | native     | N |
| Friarbird, Noisy             | Noisy Friarbird              | <i>Philemon corniculatus</i>     | native     | N |

|                            |                           |                                     |            |   |
|----------------------------|---------------------------|-------------------------------------|------------|---|
| Button-quail, Red-chested  | Red-chested Buttonquail   | <i>Turnix pyrrhorostris</i>         | native     | Y |
| Tadpoles                   | unknown                   | unknown                             | non-native | N |
| Flycatcher, Leaden         | Leaden Flycatcher         | <i>Myiagra rubecula</i>             | native     | N |
| Rosella, Yellow            | Crimson Rosella           | <i>Platycercus elegans</i>          | native     | N |
| Treecreeper, Brown         | Brown Treecreeper         | <i>Climacteris picumnus</i>         | native     | N |
| Oystercatcher, Pied        | Pied Oystercatcher        | <i>Haematopus longirostris</i>      | native     | N |
| Bandicoot, Long-nosed      | Long-nosed Bandicoot      | <i>Perameles nasuta</i>             | native     | N |
| Possum, Mountain Pygmy     | Mountain Pygmy Possum     | <i>Burramys parvus</i>              | native     | Y |
| Petrel, White-headed       | White-headed Petrel       | <i>Pterodroma lessonii</i>          | native     | N |
| Spinebill, Eastern         | Eastern Spinebill         | <i>Acanthorhynchus tenuirostris</i> | native     | N |
| Prion, Fairy               | Fairy Prion               | <i>Pachyptila turtur</i>            | native     | N |
| Kite, Black                | Black Kite                | <i>Milvus migrans</i>               | native     | N |
| Grey's Skink               | Common Dwarf Skink        | <i>Menetia greyii</i>               | native     | N |
| Growling Grass Frog        | Growling Grass Frog       | <i>Litoria raniformis</i>           | native     | Y |
| Partridge                  | unknown                   | unknown                             | non-native | N |
| Carpet Python              | Diamond Python            | <i>Morelia spilota</i>              | native     | Y |
| Button-quail, Painted      | Painted Buttonquail       | <i>Turnix varius</i>                | native     | N |
| Swift, Fork-tailed         | Pacific Swift             | <i>Apus pacificus</i>               | native     | N |
| Common Spadefoot Toad      | Common Spadefoot Toad     | <i>Neobatrachus sudelli</i>         | native     | N |
| Black-Cockatoo, Red-tailed | Red-tailed Black Cockatoo | <i>Calyptorhynchus banksii</i>      | native     | Y |
| Alpine Tree Frog           | Alpine Tree Frog          | <i>Litoria verreauxii</i>           | native     | Y |
| Unidentified Pseudomys     | Unidentified Pseudomys    | unknown                             | native     | N |
| Oriole, Olive-backed       | Olive-backed Oriole       | <i>Oriolus sagittatus</i>           | native     | N |
| Gull, Kelp                 | Kelp Gull                 | <i>Larus dominicanus</i>            | native     | N |
| Parrot, Mallee Ringneck    | Australian Ringneck       | <i>Barnardius zonarius</i>          | native     | N |
| Thick-tailed Gecko         | Thick-tailed Gecko        | <i>Underwoodisaurus milii</i>       | native     | N |
| Finch, Zebra               | Australian Zebra Finch    | <i>Taeniopygia castanotis</i>       | native     | N |
| Crow, Little               | Little Crow               | <i>Corvus bennetti</i>              | native     | N |
| Emu-wren, Southern         | Southern Emu-wren         | <i>Stipiturus malachurus</i>        | native     | N |
| Duck, Musk                 | Musk Duck                 | <i>Biziura lobata</i>               | native     | N |
| Wood Gecko                 | Desert Wood Gecko         | <i>Diplodactylus wiru</i>           | native     | N |
| Albatross, Black-browed    | Black-browed Albatross    | <i>Thalassarche melanophris</i>     | native     | N |
| Thornbill, Yellow-rumped   | Yellow-rumped Thornbill   | <i>Acanthiza chrysorrhoa</i>        | native     | N |
| Spoonbill, Yellow-billed   | Yellow-billed Spoonbill   | <i>Platalea flavipes</i>            | native     | N |
| Turnstone, Ruddy           | Turnstone                 | <i>Arenaria interpres</i>           | native     | N |
| Eggs                       | unknown                   | unknown                             | unknown    | N |
| Rat, Broad-toothed         | Broad-toothed Rat         | <i>Mastacomys fuscus</i>            | native     | Y |
| Antechinus, Yellow-footed  | Yellow-footed Antechinus  | <i>Antechinus flavipes</i>          | native     | N |

|                                            |                                 |                                        |        |   |
|--------------------------------------------|---------------------------------|----------------------------------------|--------|---|
| Bronze-Cuckoo,<br>Shining                  | Shining Bronze-cuckoo           | <i>Chalcites lucidus</i>               | native | N |
| Victorian Smooth<br>Froglet                | Victorian Smooth<br>Froglet     | <i>Geocrinia victoriana</i>            | native | N |
| New Zealand Fur-Seal                       | Antipodean Fur Seal             | <i>Arctocephalus forsteri</i>          | native | N |
| Black-Cockatoo, Glossy                     | Glossy Black Cockatoo           | <i>Calyptorhynchus lathami</i>         | native | Y |
| Duck, Blue-billed                          | Blue-billed Duck                | <i>Oxyura australis</i>                | native | Y |
| Bat, Common Bent-<br>wing                  | Schreiber's Bent-<br>winged Bat | <i>Miniopterus schreibersii</i>        | native | Y |
| Mouse, Smoky                               | Smoky Mouse                     | <i>Pseudomys fumeus</i>                | native | Y |
| Fairy-wren, White-<br>winged               | White-winged Fairy-<br>wren     | <i>Malurus leucopterus</i>             | native | N |
| Curlew, Eastern                            | Eastern Curlew                  | <i>Numenius<br/>madagascariensis</i>   | native | Y |
| Parrot, Blue-winged                        | Blue-winged Parrot              | <i>Neophema chrysostoma</i>            | native | N |
| Bittern, Little                            | unknown                         | <i>unknown</i>                         | native | N |
| Grassbird, Little                          | Little Grassbird                | <i>Poodytes gramineus</i>              | native | N |
| Teal, Chestnut                             | Chestnut Teal                   | <i>Anas castanea</i>                   | native | N |
| Grass Skink                                | Tussock Cool-skink              | <i>Pseudemoia entrecasteauxii</i>      | native | N |
| Duck, Pink-eared                           | Pink-eared Duck                 | <i>Malacorhynchus<br/>membranaceus</i> | native | N |
| Woodswallow, White-<br>browed              | White-browed<br>Woodswallow     | <i>Artamus superciliosus</i>           | native | N |
| Blind Snake<br>Ramphotyphlops<br>australis | Southern Blind Snake            | <i>Anilius australis</i>               | native | N |
| Whipbird, Eastern                          | Eastern Whipbird                | <i>Psophodes olivaceus</i>             | native | N |
| Green Turtle                               | Green Turtle                    | <i>Chelonia mydas</i>                  | native | N |
| Honeyeater, Blue-faced                     | Blue-faced Honeyeater           | <i>Entomyzon cyanotis</i>              | native | N |
| Shelduck, Australian                       | Chestnut-breasted<br>Shelduck   | <i>Tadorna tadornoides</i>             | native | N |
| Cuckoo, Brush                              | Brush Cuckoo                    | <i>Cacomantis variolosus</i>           | native | N |
| Songlark, Rufous                           | Rufous Songlark                 | <i>Cincloramphus mathewsi</i>          | native | N |
| Bat, Gould's Long-<br>eared                | Gould's Long-eared<br>Bat       | <i>Nyctophilus gouldi</i>              | native | N |
| Dollarbird                                 | Dollarbird                      | <i>Eurystomus orientalis</i>           | native | N |
| Fantail, Rufous                            | Rufous Fantail                  | <i>Rhipidura rufifrons</i>             | native | N |
| Bee-eater, Rainbow                         | Rainbow Bee-eater               | <i>Merops ornatus</i>                  | native | N |
| Striped Legless Lizard                     | Striped Legless Lizard          | <i>Delma impar</i>                     | native | Y |
| Loggerhead Turtle                          | Loggerhead Turtle               | <i>Caretta caretta</i>                 | native | N |
| Broad-shelled Tortoise                     | Broad Shelled Turtle            | <i>Chelodina expansa</i>               | native | Y |
| Rail, Lewin's                              | Lewin's Rail                    | <i>Lewinia pectoralis</i>              | native | Y |
| Scrubwren, White-<br>browed                | White-browed<br>Scrubwren       | <i>Sericornis frontalis</i>            | native | N |
| Bat, Eastern Broad-<br>nosed               | Eastern Broad-nosed<br>Bat      | <i>Scotorepens orion</i>               | native | N |
| Crake, Spotless                            | Spotless Crake                  | <i>Zapornia tabuensis</i>              | native | N |
| Sandpiper, Common                          | Common Sandpiper                | <i>Actitis hypoleucos</i>              | native | N |
| Stilt, Black-winged                        | Black-winged Stilt              | <i>Himantopus himantopus</i>           | native | N |
| Mistletoebird                              | Mistletoebird                   | <i>Dicaeum hirundinaceum</i>           | native | N |

|                            |                           |                                   |        |   |
|----------------------------|---------------------------|-----------------------------------|--------|---|
| Flying-fox, Little Red     | Little Red Flying Fox     | <i>Pteropus scapulatus</i>        | native | N |
| Glider, Squirrel           | Squirrel Glider           | <i>Petaurus norfolcensis</i>      | native | Y |
| Thornbill, Brown           | Brown Thornbill           | <i>Acanthiza pusilla</i>          | native | N |
| Honeyeater, Pied           | Pied Honeyeater           | <i>Certhionyx variegatus</i>      | native | N |
| Duck, Maned                | Maned Duck                | <i>Chenonetta jubata</i>          | native | N |
| Tern, Caspian              | Caspian Tern              | <i>Hydroprogne caspia</i>         | native | Y |
| Honeyeater, Crescent       | Crescent Honeyeater       | <i>Phylidonyris pyrrhopterus</i>  | native | N |
| Whistler, Rufous           | Rufous Whistler           | <i>Pachycephala rufiventris</i>   | native | N |
| Robin, Rose                | Rose Robin                | <i>Petroica rosea</i>             | native | N |
| Possum, Leadbeater's       | Leadbeater's Possum       | <i>Gymnobelideus leadbeateri</i>  | native | Y |
| Honeyeater, Black-chinned  | Black-chinned Honeyeater  | <i>Melithreptus gularis</i>       | native | N |
| Oystercatcher, Sooty       | Sooty Oystercatcher       | <i>Haematopus fuliginosus</i>     | native | N |
| Lobster, Freshwater        | unknown                   | unknown                           | native | N |
| Honeyeater, Black          | Black Honeyeater          | <i>Sugomel nigrum</i>             | native | N |
| Shearwater, Sooty          | Sooty Shearwater          | <i>Ardenna grisea</i>             | native | N |
| Albatross, Shy             | Shy Albatross             | <i>Thalassarche cauta</i>         | native | Y |
| Beaded Gecko               | Beaded Gecko              | <i>Lucasium damaeum</i>           | native | N |
| Parrot, Blue Bonnet        | Bluebonnet                | <i>Northiella haematogaster</i>   | native | N |
| Shearwater, Hutton's       | Hutton's Shearwater       | <i>Puffinus huttoni</i>           | native | N |
| Babbler, White-browed      | White-browed Babbler      | <i>Pomatostomus superciliosus</i> | native | N |
| Cuckoo-strike, Ground      | Ground Cuckooshrike       | <i>Coracina maxima</i>            | native | Y |
| Songlark, Brown            | Brown Songlark            | <i>Cincloramphus cruralis</i>     | native | N |
| Tern, Fairy                | Fairy Tern                | <i>Gygis alba</i>                 | native | Y |
| Small-scaled Snake         | Inland taipan             | <i>Oxyuranus microlepidotus</i>   | native | N |
| Dotterel, Red-kneed        | Red-kneed Dotterel        | <i>Erythrogonyx cinctus</i>       | native | N |
| Crake, Australian          | Australian Crake          | <i>Porzana fluminea</i>           | native | N |
| Martin, Tree               | Tree Martin               | <i>Petrochelidon nigricans</i>    | native | N |
| Storm-Petrel, Grey-backed  | Gray-backed Storm-Petrel  | <i>Garrodia nereis</i>            | native | N |
| Spotted Marsh Frog         | Spotted Grass Frog        | <i>Limnodynastes tasmaniensis</i> | native | N |
| Bandicoot, Eastern Barred  | Eastern Barred Bandicoot  | <i>Perameles gunnii</i>           | native | Y |
| Needletail, White-throated | Spine-tailed Swift        | <i>Hirundapus caudacutus</i>      | native | Y |
| Friarbird, Little          | Little Friarbird          | <i>Philemon citreogularis</i>     | native | N |
| Potoroo, Long-nosed        | Long-nosed Potoroo        | <i>Potorous tridactylus</i>       | native | Y |
| Hylacola, Chestnut-rumped  | Chestnut-rumped Heathwren | <i>Calamanthus pyrrhopygius</i>   | native | Y |
| Crab-eater Seal            | Crabeater Seal            | <i>Lobodon carcinophaga</i>       | native | N |
| Whale, Sperm               | Sperm Whale               | <i>Physeter macrocephalus</i>     | native | N |
| Common Wallaroo            | Common Wallaroo           | <i>Macropus robustus</i>          | native | Y |
| Honeyeater, Yellow-plumed  | Yellow-plumed Honeyeater  | <i>Ptilotula ornata</i>           | native | N |
| Robin, Pink                | Pink Robin                | <i>Petroica rodinogaster</i>      | native | N |
| Dotterel, Inland           | Inland Dotterel           | <i>Peltohyas australis</i>        | native | N |
| Jacky Winter               | Jacky Winter              | <i>Microeca fascinans</i>         | native | N |

|                             |                                 |                                      |            |   |
|-----------------------------|---------------------------------|--------------------------------------|------------|---|
| Sand Goanna                 | Sand Monitor                    | <i>Varanus gouldii</i>               | native     | N |
| Green and Golden Grass Frog | Green and Gold Frog             | <i>Litoria raniformis</i>            | native     | Y |
| Firetail, Diamond           | Diamond Firetail                | <i>Stagonopleura guttata</i>         | native     | Y |
| Petrel, Cape                | Cape Pigeon                     | <i>Daption capense</i>               | native     | N |
| Fairy-wren, Variegated      | Variegated Fairy-wren           | <i>Malurus lamberti</i>              | native     | N |
| Martin, Fairy               | Fairy Martin                    | <i>Petrochelidon ariel</i>           | native     | N |
| Peron's Tree Frog           | Emerald Spotted Treefrog        | <i>Litoria peronii</i>               | native     | N |
| Honeyeater, Lewin's         | Lewin's Honeyeater              | <i>Meliphaga lewinii</i>             | native     | N |
| Petrel, Blue                | Blue Petrel                     | <i>Halobaena caerulea</i>            | native     | N |
| Duck, Plumed Whistling      | Plumed Whistling-duck           | <i>Dendrocygna eytoni</i>            | native     | N |
| Snipe, Latham's             | Japanese Snipe                  | <i>Gallinago hardwickii</i>          | native     | N |
| Honeyeater, Yellow-faced    | Yellow-faced Honeyeater         | <i>Caligavis chrysops</i>            | native     | N |
| Cunningham's Skink          | Cunningham's Spiny-tailed Skink | <i>Egernia cunninghami</i>           | native     | N |
| Potoroo, Unidentified       | Potoroo, Unidentified           | unknown                              | native     | N |
| Plover, Red-capped          | Red-capped Dotterel             | <i>Charadrius ruficapillus</i>       | native     | N |
| Osprey                      | Osprey                          | <i>Pandion haliaetus</i>             | native     | N |
| Delicate Skink              | Rainbow Skink                   | <i>Lampropholis delicata</i>         | native     | N |
| Coral Snake                 | Australian coral snake          | <i>Brachyuropsis australis</i>       | native     | N |
| Unidentified Wattled bat    | Unidentified Wattled bat        | unknown                              | native     | N |
| Firetail, Beautiful         | Beautiful Firetail              | <i>Stagonopleura bella</i>           | native     | N |
| Tern, White-fronted         | White-fronted Tern              | <i>Sterna striata</i>                | native     | N |
| Bronze-Cuckoo, Horsfield's  | Horsfield's Bronze Cuckoo       | <i>Chalcites basalis</i>             | native     | N |
| Dragon, Mountain            | Mountain Dragon                 | <i>Rankinia diemensis</i>            | native     | N |
| Plains-wanderer             | Plains-wanderer                 | <i>Pedionomus torquatus</i>          | native     | Y |
| Avocet, Red-necked          | Red-necked Avocet               | <i>Recurvirostra novaehollandiae</i> | native     | N |
| Jaeger, Arctic              | Arctic Jaeger                   | <i>Stercorarius parasiticus</i>      | native     | N |
| Eastern Water Skink         | Eastern Water-skink             | <i>Eulamprus quoyii</i>              | native     | N |
| Cisticola, Golden-headed    | Golden-headed Cisticola         | <i>Cisticola exilis</i>              | native     | N |
| Black Rock Skink            | Black Crevice-skink             | <i>Egernia saxatilis</i>             | native     | N |
| Skua, Great                 | unknown                         | unknown                              | native     | N |
| Parrot, Turquoise           | Turquoise Parrot                | <i>Neophema pulchella</i>            | native     | Y |
| Tree Dragon                 | unknown                         | unknown                              | native     | N |
| Plover, Grey                | Black-bellied Plover            | <i>Pluvialis squatarola</i>          | native     | N |
| Eastern Small-eyed Snake    | Small-eyed Snake                | <i>Cryptophis nigrescens</i>         | native     | N |
| Shearwater, Fluttering      | Fluttering Shearwater           | <i>Puffinus gavia</i>                | native     | N |
| Lorikeet, Scaly-breasted    | Scaly-breasted Lorikeet         | <i>Trichoglossus chlorolepidotus</i> | native     | N |
| Tern, Arctic                | Arctic Tern                     | <i>Sterna paradisaea</i>             | native     | N |
| Eastern Water Dragon        | Eastern Water Dragon            | <i>Intellagama lesueurii</i>         | native     | N |
| Bird, pet                   | unknown                         | unknown                              | non-native | N |

|                             |                               |                                  |            |   |
|-----------------------------|-------------------------------|----------------------------------|------------|---|
| Dog, domestic               | unknown                       | unknown                          | non-native | N |
| Apostlebird                 | Apostlebird                   | <i>Struthidea cinerea</i>        | native     | Y |
| Tern, Little                | Little Tern                   | <i>Sternula albifrons</i>        | native     | Y |
| Honeyeater, Yellow-tufted   | Yellow-tufted Honeyeater      | <i>Lichenostomus melanops</i>    | native     | Y |
| Albatross, Wandering        | Wandering Albatross           | <i>Diomedea exulans</i>          | native     | Y |
| Quoll, Unidentified         | Quoll, Unidentified           | unknown                          | native     | N |
| Honeyeater, Regent          | Regent Honeyeater             | <i>Anthochaera phrygia</i>       | native     | Y |
| Thornbill, Yellow           | Yellow Thornbill              | <i>Acanthiza nana</i>            | native     | N |
| Flycatcher, Satin           | Satin Flycatcher              | <i>Myiagra cyanoleuca</i>        | native     | N |
| Red-naped Snake             | Red-naped Snake               | <i>Furina diadema</i>            | native     | Y |
| Giant Burrowing Frog        | Giant Burrowing Frog          | <i>Heleioporus australiacus</i>  | native     | Y |
| Honeyeater, Brown-headed    | Brown-headed Honeyeater       | <i>Melithreptus brevirostris</i> | native     | N |
| Honeyeater, Singing         | Singing Honeyeater            | <i>Gavicalis virescens</i>       | native     | N |
| Warbler, Speckled           | Speckled Warbler              | <i>Pyrholaemus sagittatus</i>    | native     | Y |
| Tern, Whiskered             | Whiskered Tern                | <i>Chlidonias hybrida</i>        | native     | N |
| Woodswallow, Dusky          | Dusky Woodswallow             | <i>Artamus cyanopterus</i>       | native     | N |
| Heron, Striated             | Green-backed Heron            | <i>Butorides striata</i>         | native     | N |
| Yellow-bellied Sea Snake    | Yellow-bellied Sea Snake      | <i>Pelamis platura</i>           | native     | N |
| Bushlark, Singing           | Singing Bushlark              | <i>Mirafrja javanica</i>         | native     | N |
| Shark                       | unknown                       | unknown                          | unknown    | N |
| Teal, Grey                  | Grey Teal                     | <i>Anas gracilis</i>             | native     | N |
| Bynoe's Gecko               | Prickly Gecko                 | <i>Heteronotia binoei</i>        | native     | N |
| Antechinus, Swamp           | Swamp Antechinus              | <i>Antechinus minimus</i>        | native     | Y |
| Greenshank                  | Greenshank                    | <i>Tringa nebularia</i>          | native     | N |
| Thrush, White's             | White's Thrush                | <i>Zoothera aurea</i>            | native     | N |
| Parrot, Orange-bellied      | Orange-bellied Parrot         | <i>Neophema chrysogaster</i>     | native     | Y |
| Native-hen, Black-tailed    | Black-tailed Nativehen        | <i>Tribonyx ventralis</i>        | native     | N |
| Thornbill, Striated         | Striated Thornbill            | <i>Acanthiza lineata</i>         | native     | N |
| Bellbird, Crested           | Crested Bellbird              | <i>Oreoica gutturalis</i>        | native     | Y |
| Treecreeper, White-throated | White-throated Treecreeper    | <i>Cormobates leucophaea</i>     | native     | N |
| Nightjar, White-throated    | White-throated Eared-Nightjar | <i>Eurostopodus mystacalis</i>   | native     | N |
| Albatross, Yellow-nosed     | Indian Yellow-nosed Albatross | <i>Thalassarche carteri</i>      | native     | Y |
| Petrel, Great-winged        | Great-winged Petrel           | <i>Pterodroma macroptera</i>     | native     | N |
| Blind Snake                 |                               |                                  |            |   |
| Ramphotyphlops nigriscens   | Blackish Blind Snake          | <i>Anilius nigrescens</i>        | native     | N |
| Thornbill, Chestnut-rumped  | Chestnut-rumped Thornbill     | <i>Acanthiza uropygialis</i>     | native     | N |
| Thrush, Bassian             | Bassian Thrush                | <i>Zoothera lunulata</i>         | native     | N |
| Antechinus, Agile           | Agile Antechinus              | <i>Antechinus agilis</i>         | native     | N |
| Crake, Baillon's            | Baillons Crake                | <i>Zapornia pusilla</i>          | native     | N |
| Woodswallow, White-breasted | White-breasted Woodswallow    | <i>Artamus leucorhyn</i>         | native     | N |

|                          |                             |                                    |        |   |
|--------------------------|-----------------------------|------------------------------------|--------|---|
| Bandy Bandy              | Eastern Bandy-bandy         | <i>Vermicella annulata</i>         | native | Y |
| Baw Baw Frog             | Baw Baw Frog                | <i>Philoria frosti</i>             | native | Y |
| Pigeon, White-Headed     | White-headed Pigeon         | <i>Columba leucomela</i>           | native | N |
| Giant Bullfrog           | Giant Banjo Frog            | <i>Limnodynastes interioris</i>    | native | Y |
| Flycatcher, Restless     | Restless Flycatcher         | <i>Myiagra inquieta</i>            | native | N |
| Stilt, Banded            | Banded Stilt                | <i>Cladorhynchus leucocephalus</i> | native | N |
| Chat, Orange             | Orange Chat                 | <i>Epthianura aurifrons</i>        | native | N |
| Possum, Little Pygmy     | Little Pygmy Possum         | <i>Cercartetus lepidus</i>         | native | N |
| Tern, White-winged       | White-winged Tern           | <i>Chlidonias leucopterus</i>      | native | N |
| Common Froglet           | Sign-bearing Froglet        | <i>Crinia insignifera</i>          | native | N |
| Pardalote, Yellow-rumped | Spotted Pardalote           | <i>Pardalotus punctatus</i>        | native | N |
| Egret, Eastern Reef      | Reef Heron                  | <i>Egretta sacra</i>               | native | N |
| Storm-Petrel, Wilson's   | Wilson's Storm-Petrel       | <i>Oceanites oceanicus</i>         | native | N |
| Treecreeper, Red-browed  | Red-browed Treecreeper      | <i>Climacteris erythrops</i>       | native | N |
| Emu-wren, Rufous-crowned | Rufous-crowned Emu-wren     | <i>Stipiturus ruficeps</i>         | native | N |
| Penguin, Rockhopper      | Southern Rockhopper Penguin | <i>Eudyptes chrysocome</i>         | native | N |
| White-lipped Snake       | White-lipped Snake          | <i>Drysdalia coronoides</i>        | native | N |
| Verreaux's Tree Frog     | Verreaux's Tree Frog        | <i>Litoria verreauxii</i>          | native | Y |
| Kingfisher, Red-backed   | Red-backed Kingfisher       | <i>Todiramphus pyrrhopygius</i>    | native | N |
| Triller, White-winged    | White-winged Triller        | <i>Lalage tricolor</i>             | native | N |
| Sandpiper, Sharp-tailed  | Sharp-tailed Sandpiper      | <i>Calidris acuminata</i>          | native | N |
| Koel, Eastern            | unknown                     | unknown                            | native | N |

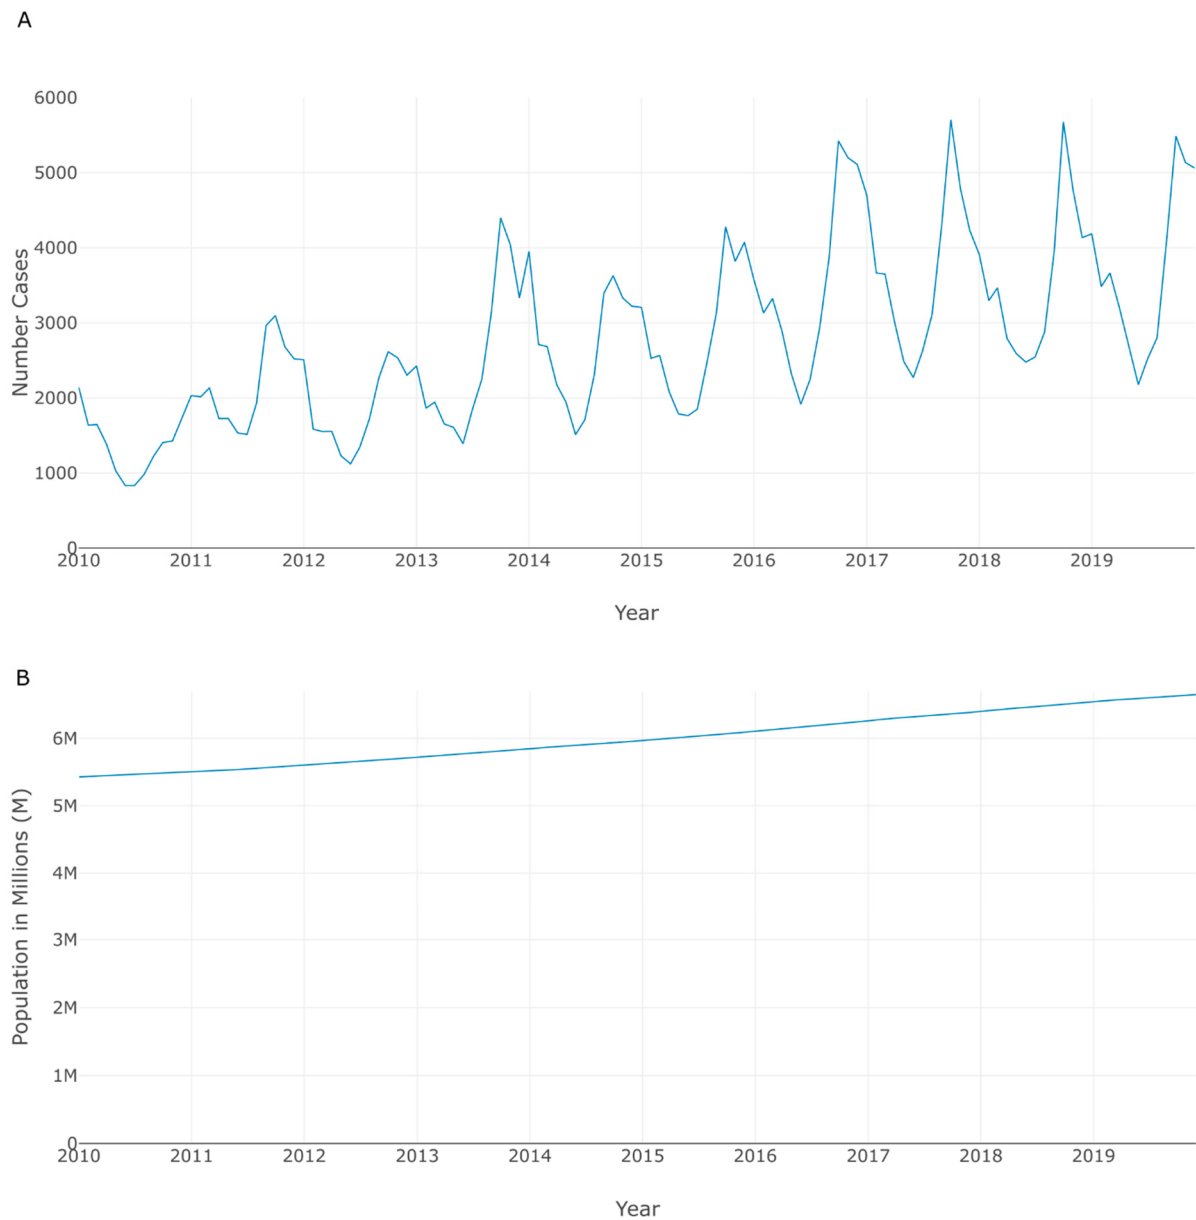

**Figure S1.** (A) Number of wildlife reports received by Wildlife Victoria from 2010 to 2019 (n=333,900); (B) estimated Victorian resident population (Australian Bureau of Statistics data) from 2010 to 2019.
